# Supplementary material
Source: PubMed Central journal article supplement (PMC2788105)
Supplement: NIHMS144243-supplement-01.pdf [file NIHMS144243-supplement-01.pdf]

Supplementary Table I. Characterization of RSV specific V<sub>H</sub> regions in adult donors

| Donor | Clone  | V <sub>H</sub> | D <sub>H</sub> | J <sub>H</sub> | Total Fr | Total CDR 1 and 2 | Total N | Total P | D Mutations | J Mutations | CDR3 length (aa) | GenBank number |
|-------|--------|----------------|----------------|----------------|----------|-------------------|---------|---------|-------------|-------------|------------------|----------------|
| 1     | RSV1H  | 3-23           | 2-21/inv       | 4              | 0        | 0                 | 9       | 1       | 0           | 0           | 15               | FJ385277       |
|       | RSV2H  | 3-30           | 5-05           | 4              | 1        | 0                 | 26      | 0       | 1           | 0           | 20               | FJ385278       |
|       | RSV3H  | 4-39           | 2-02           | 3              | 1        | 0                 | 26      | 0       | 0           | 0           | 25               | FJ385279       |
|       | RSV4H  | 3-30           | 3-16           | 5              | 0        | 0                 | 11      | 3       | 3           | 0           | 21               | FJ385280       |
|       | RSV5H  | 4-31           | 1-20           | 4              | 22       | 6                 | 20      | 0       | 3           | 1           | 18               | FJ385281       |
|       | RSV6H  | 3-23           | 2-08           | 4              | 4        | 4                 | 19      | 2       | 1           | 1           | 21               | FJ385282       |
|       | RSV17H | 3-23           | 3-10           | 5              | 11       | 12                | 18      | 0       | 4           | 2           | 15               | FJ385293       |
| 3     | RSV7H  | 3-33           | NA             | 4              | 0        | 0                 | 8       | 1       | 2           | 0           | 14               | FJ385283       |
|       | RSV18H | 4-04           | 3-09/inv       | 4              | 10       | 6                 | 6       | 0       | 3           | 1           | 12               | FJ385294       |
| 4     | RSV8H  | 1-02           | 6-06           | 4              | 0        | 1                 | 1       | 0       | 0           | 1           | 10               | FJ385284       |
|       | RSV9H  | 3-33           | 4-17           | 6              | 0        | 0                 | 21      | 2       | 0           | 0           | 19               | FJ385285       |
|       | RSV10H | 6-01           | 1-07           | 4              | 4        | 1                 | 14      | 0       | 0           | 0           | 15               | FJ385286       |
|       | RSV11H | 3-33           | 3-03           | 3              | 0        | 0                 | 5       | 2       | 0           | 0           | 17               | FJ385287       |
|       | RSV12H | 3-64           | 1-26           | 3              | 2        | 0                 | 0       | 0       | 1           | 0           | 11               | FJ385288       |
|       | RSV13H | 3-30           | 3-22           | 4              | 0        | 0                 | 10      | 3       | 4           | 0           | 19               | FJ385289       |
|       | RSV14H | 4-59           | NA             | 4              | 17       | 8                 | 11      | 0       | 3           | 1           | 11               | FJ385290       |
|       | RSV15H | 3-23           | 5-24           | 1              | 0        | 0                 | 3       | 1       | 1           | 0           | 14               | FJ385291       |
|       | RSV16H | 4-39           | 2-02           | 6              | 0        | 0                 | 4       | 0       | 4           | 0           | 22               | FJ385292       |
| 12    | RSV20H | 3-33           | 4-17           | 6              | 0        | 0                 | 28      | 2       | 0           | 2           | 19               | FJ385295       |
|       | RSV21H | 4-04           | 2-02           | 3              | 0        | 0                 | 7       | 0       | 1           | 0           | 10               | FJ385296       |
| 13    | RSV33H | 3-30           | 3-03           | 4              | 5        | 3                 | 7       | 0       | 3           | 0           | 12               | FJ385307       |
|       | RSV27H | 3-30.3         | 3-22           | 3              | 0        | 0                 | 10      | 1       | 3           | 0           | 21               | FJ385302       |
|       | RSV28H | 3-09           | 6-15           | 4              | 0        | 0                 | 12      | 0       | 4           | 0           | 15               | FJ385303       |
|       | RSV29H | 3-09           | NA             | 3              | 0        | 1                 | 8       | 0       | 3           | 2           | 12               | FJ385304       |
|       | RSV30H | 1-18           | 6-19/inv       | 6              | 0        | 0                 | 2       | 0       | 4           | 0           | 18               | FJ385305       |
|       | RSV32H | 1-69           | 5-12           | 4              | 1        | 0                 | 3       | 2       | 3           | 0           | 14               | FJ385306       |
|       | RSV35H | 4-04           | 3-10           | 3              | 4        | 2                 | 5       | 0       | 3           | 2           | 16               | FJ385308       |
|       | RSV38H | 3-23           | 4-17           | 4              | 1        | 0                 | 5       | 1       | 3           | 0           | 12               | FJ385309       |
|       | RSV43H | 3-30           | 4-17           | 6              | 4        | 3                 | 9       | 1       | 0           | 1           | 15               | FJ385312       |
|       | RSV44H | 3-15           | 3-09           | NA             | 15       | 7                 | 4       | 1       | 3           | 2           | 14               | FJ385313       |
|       | RSV45H | 4-04           | 2-02/inv       | 3              | 9        | 3                 | 6       | 1       | 4           | 2           | 15               | FJ385314       |
|       | RSV46H | 3-23           | NA             | NA             | 14       | 7                 | 7       | 2       | 4           | 1           | 14               | FJ385315       |
|       | RSV47H | 3-43           | NA             | 4              | 6        | 2                 | 7       | 0       | 0           | 1           | 13               | FJ385316       |
|       | RSV48H | 3-23           | NA             | 5              | 0        | 1                 | 0       | 0       | 0           | 0           | 7                | FJ385317       |
|       | RSV49H | 4-59           | 6-19           | 3              | 5        | 3                 | 6       | 1       | 1           | 2           | 14               | FJ385318       |
|       | RSV50H | 1-18           | 7-27           | 5              | 1        | 0                 | 14      | 0       | 2           | 2           | 12               | FJ385319       |
|       | RSV52H | 1-02           | 6-06           | 4              | 1        | 1                 | 1       | 0       | 0           | 1           | 10               | FJ385320       |
|       | RSV53H | 4-04           | NA             | 4              | 14       | 9                 | 10      | 1       | 0           | 0           | 13               | FJ385321       |
|       | RSV54H | 1-08           | 2-15           | 6              | 1        | 0                 | 4       | 1       | 2           | 0           | 21               | FJ385322       |
|       | RSV55H | 3-15           | NA             | 5              | 2        | 0                 | 1       | 0       | 0           | 2           | 8                | FJ385323       |
| 14    | RSV22H | 2-70           | 2-15           | 4              | 3        | 0                 | 9       | 0       | 4           | 0           | 13               | FJ385297       |
|       | RSV23H | 3-33           | 4-17           | 4              | 2        | 0                 | 9       | 0       | 3           | 0           | 15               | FJ385298       |

Supplementary Table I. Characterization of RSV specific V<sub>H</sub> regions in adult donors

| Donor | Clone    | V <sub>H</sub> | D <sub>H</sub> | J <sub>H</sub> | Total Fr | Total CDR 1 and 2 | Total N | Total P | D Mutations | J Mutations | CDR3 length (aa) | GenBank number |
|-------|----------|----------------|----------------|----------------|----------|-------------------|---------|---------|-------------|-------------|------------------|----------------|
|       | RSV24H   | 1-03           | 1-01           | 5              | 0        | 0                 | 13      | 0       | 3           | 0           | 12               | FJ385299       |
|       | RSV25H   | 3-15           | 4-17           | 6              | 0        | 1                 | 13      | 1       | 0           | 1           | 19               | FJ385300       |
|       | RSV26H   | 3-15           | 2-15           | 4              | 0        | 0                 | 5       | 0       | 1           | 2           | 15               | FJ385301       |
| 15    | RSV40H   | 5-51           | 3-03           | 4              | 0        | 0                 | 14      | 0       | 0           | 1           | 18               | FJ385310       |
|       | RSV41H   | 3-23           | NA             | 4              | 3        | 5                 | 11      | 1       | 4           | 2           | 15               | FJ385311       |
| 17    | RSV216H  | 4-04           | 2-15           | 4              | 12       | 9                 | 8       | 0       | 1           | 1           | 18               | FJ385335       |
| 19    | RSV57H   | 3-73           | 5-05           | 4              | 0        | 1                 | 7       | 0       | 0           | 1           | 11               | FJ385324       |
|       | RSV58H   | 3-30           | NA             | 6              | 0        | 0                 | 0       | 0       | 0           | 2           | 15               | FJ385325       |
|       | RSV59H   | 5-51           | 4-23           | 4              | 2        | 3                 | 13      | 0       | 4           | 0           | 16               | FJ385326       |
| 20    | RSV200H  | 3-30           | 3-16           | 6              | 4        | 5                 | 17      | 0       | 2           | 1           | 18               | FJ385327       |
|       | RSV201H  | 4-30-4         | 2-15           | 4              | 0        | 0                 | 0       | 0       | 3           | 2           | 16               | FJ385328       |
|       | RSV204H  | 3-30           | 7-27           | 4              | 20       | 15                | 1       | 0       | 2           | 1           | 8                | FJ385329       |
|       | RSV208H  | 1-18           | 3-03           | 4              | 0        | 0                 | 13      | 3       | 0           | 0           | 21               | FJ385330       |
| 33    | RSV212HA | 4-34           | 3-03           | 5              | 0        | 0                 | 11      | 0       | 0           | 0           | 18               | FJ385331       |
|       | RSV213HA | 4-59           | 1-01           | 6              | 2        | 0                 | 3       | 0       | 0           | 0           | 15               | FJ385332       |
|       | RSV214H  | 1-18           | 3-03           | 6              | 0        | 0                 | 6       | 3       | 0           | 0           | 21               | FJ385333       |
|       | RSV215HB | 3-48           | 3-03           | 4              | 0        | 0                 | 27      | 0       | 0           | 0           | 23               | FJ385334       |
|       | RSV217H  | 4-59           | 3-03           | 6              | 0        | 0                 | 8       | 1       | 2           | 0           | 23               | FJ385336       |
|       | RSV218H  | 4-34           | 3-03           | 5              | 2        | 1                 | 7       | 0       | 3           | 0           | 20               | FJ385337       |
| 37    | RSV219H  | 3-53           | 6-13           | 6              | 0        | 0                 | 10      | 0       | 2           | 0           | 19               | FJ385338       |
|       | RSV220H  | 3-53           | 1-01           | 3              | 5        | 2                 | 8       | 0       | 4           | 0           | 12               | FJ385339       |
|       | RSV221H  | 5-a            | 2-15           | 5              | 6        | 1                 | 10      | 0       | 4           | 2           | 18               | FJ385340       |
|       | RSV222H  | 3-64           | 2-15           | 5              | 2        | 0                 | 9       | 1       | 0           | 2           | 19               | FJ385341       |
|       | RSV223H  | 4-30-4         | 6-19           | 1              | 10       | 2                 | 7       | 0       | 1           | 0           | 12               | FJ385342       |
|       | RSV224HB | 1-46           | 3-16           | 6              | 2        | 4                 | 3       | 0       | 3           | 0           | 13               | FJ385343       |
|       | RSV225H  | 4-04           | 3-03           | 2              | 17       | 3                 | 15      | 1       | 3           | 2           | 19               | FJ385344       |
|       | RSV227HA | 4-61           | 2-02           | 6              | 4        | 1                 | 12      | 0       | 1           | 0           | 20               | FJ385345       |
| 43    | RSV228H  | 5-51           | NA             | 3              | 1        | 2                 | 3       | 0       | 3           | 0           | 11               | FJ385346       |
|       | RSV229H  | 3-53           | 5-05           | 6              | 0        | 0                 | 7       | 3       | 2           | 0           | 20               | FJ385347       |
|       | RSV230H  | 3-48           | 2-02           | 3              | 11       | 4                 | 21      | 0       | 3           | 1           | 19               | FJ385348       |
|       | RSV231H  | 3-48           | 5-12           | 3              | 1        | 1                 | 5       | 2       | 4           | 1           | 16               | FJ385349       |
|       | RSV232H  | 3-72           | 6-19           | 3              | 0        | 0                 | 12      | 2       | 0           | 0           | 17               | FJ385350       |
|       | RSV233H  | 4-34           | 5-05           | 3              | 0        | 0                 | 9       | 2       | 4           | 0           | 0                | FJ385351       |
|       | RSV234H  | 4-04           | 6-19           | 6              | 0        | 0                 | 13      | 1       | 1           | 0           | 21               | FJ385352       |
|       | RSV235HB | 4-39           | 3-03           | 4              | 0        | 1                 | 0       | 0       | 1           | 0           | 14               | FJ385353       |
|       | RSV236H  | 1-18           | 2-02           | 4              | 0        | 0                 | 16      | 1       | 1           | 0           | 22               | FJ385354       |
|       | RSV237H  | 3-73           | 1-26           | 6              | 0        | 0                 | 11      | 1       | 0           | 2           | 21               | FJ385355       |
|       | RSV238H  | 4-04           | 3-10           | 3              | 0        | 0                 | 27      | 1       | 0           | 1           | 25               | FJ385356       |
|       | RSV239H  | 3-23           | 3-10           | 4              | 0        | 0                 | 20      | 2       | 0           | 1           | 22               | FJ385357       |
| 43    | RSV240H  | 3-23           | 3-09           | 4              | 0        | 0                 | 31      | 0       | 0           | 0           | 23               | FJ385358       |
|       | RSV241H  | 3-30.3         | 2-08           | 4              | 0        | 0                 | 9       | 1       | 1           | 1           | 17               | FJ385359       |

Supplementary Table II. Characterization of RSV specific V<sub>H</sub> regions in infant donors >3months

| Donor | Age in months | Clone     | V <sub>H</sub> | D <sub>H</sub> | J <sub>H</sub> | Total Fr | Total CDR 1 and 2 | Total N | Total P | D Mutations | J Mutations | CDR3 length (aa) | GenBank number |
|-------|---------------|-----------|----------------|----------------|----------------|----------|-------------------|---------|---------|-------------|-------------|------------------|----------------|
| 24    | 60            | RSV67H    | 3-09           | 6-19           | 1              | 2        | 3                 | 6       | 0       | 3           | 2           | 14               | FJ385360       |
| 40    | 20            | RSV77H    | 3-23           | 5-24           | 4              | 0        | 0                 | 25      | 0       | 0           | 1           | 19               | FJ385361       |
|       | 20            | RSV79H    | 3-64           | 3-09           | 4              | 25       | 12                | 21      | 0       | 4           | 2           | 20               | FJ385362       |
| 41    | 8             | RSV82H    | 1-18           | 3-22           | 3              | 7        | 4                 | 29      | 0       | 4           | 2           | 19               | FJ385363       |
|       | 8             | RSV86H    | 3-07           | 6-19           | 4              | 15       | 10                | 5       | 0       | 3           | 0           | 10               | FJ385364       |
|       | 8             | RSV87H    | 3-30.3         | 3-10           | 4              | 0        | 0                 | 29      | 0       | 1           | 2           | 20               | FJ385365       |
|       | 8             | RSV88H    | 3-30           | 2-02           | 6              | 0        | 0                 | 17      | 1       | 2           | 1           | 26               | FJ385366       |
|       | 8             | RSV90H    | 3-15           | NA             | 5              | 14       | 9                 | 2       | 0       | 0           | 0           | 6                | FJ385367       |
|       | 8             | RSV91H    | 3-74           | 5-24           | 4              | 2        | 1                 | 17      | 2       | 4           | 1           | 17               | FJ385368       |
|       | 8             | RSV94H    | 5-51           | NA             | 4              | 11       | 5                 | 14      | 0       | 0           | 0           | 13               | FJ385369       |
|       | 8             | RSV116H   | 4-31           | 6-19           | 2              | 0        | 0                 | 9       | 0       | 1           | 0           | 14               | FJ385370       |
| 25    | 8             | RSV118H   | 4-39           | 5-12           | 4              | 0        | 1                 | 8       | 0       | 2           | 0           | 15               | FJ385371       |
|       | 15            | RSV143H   | 4-04           | 2-02           | 3              | 0        | 0                 | 5       | 0       | 0           | 1           | 18               | FJ385372       |
|       | 15            | RSV174H   | 4-59           | 1-26           | 3              | 3        | 1                 | 1       | 0       | 2           | 1           | 12               | FJ385376       |
|       | 15            | RSV175H-1 | 4-39           | 5-05           | 4              | 1        | 0                 | 18      | 3       | 1           | 2           | 21               | FJ385377       |
| 42    | 15            | RSV176H-2 | 4-34           | 3-03           | 4              | 1        | 0                 | 3       | 1       | 3           | 0           | 16               | FJ385378       |
|       | 7             | RSV147H   | 4-39           | 6-19           | 6              | 0        | 0                 | 15      | 0       | 2           | 0           | 23               | FJ385373       |
|       | 7             | RSV148H   | 3-15           | 6-13           | 6              | 0        | 0                 | 12      | 2       | 0           | 1           | 21               | FJ385374       |
|       | 7             | RSV149H   | 1-03           | 1-26           | 5              | 2        | 0                 | 1       | 1       | 4           | 0           | 14               | FJ385375       |

Supplementary Table III. Characterization of RSV specific V<sub>H</sub> regions in infant donors <3 months

| Donor | Age in weeks | Clone     | V <sub>H</sub> | D <sub>H</sub> | J <sub>H</sub> | Total Fr | Total CDR1 and 2 | Total N | Total P | D Mutations | J Mutations | CDR3 length (aa) | GenBank number |
|-------|--------------|-----------|----------------|----------------|----------------|----------|------------------|---------|---------|-------------|-------------|------------------|----------------|
| 22    | 8            | RSV60H    | 1-69           | 3-10           | 5              | 0        | 0                | 14      | 2       | 1           | 0           | 23               | FJ385379       |
|       | 8            | RSV61H    | 3-23           | 5-24           | 4              | 1        | 0                | 25      | 0       | 0           | 1           | 19               | FJ385380       |
|       | 8            | RSV64H    | 1-69           | 5-05           | 6              | 1        | 0                | 32      | 0       | 0           | 0           | 19               | FJ385381       |
| 28    | 8            | RSV121H   | 3-15           | 3-03           | 6              | 0        | 0                | 9       | 0       | 2           | 0           | 23               | FJ385398       |
| 29    | 11           | RSV128H   | 3-15           | 3-22           | 5              | 3        | 0                | 6       | 0       | 0           | 0           | 13               | FJ385399       |
| 38    | 11           | RSV73H    | 4-04           | NA             | 4              | 13       | 7                | 2       | 0       | 0           | 1           | 10               | FJ385382       |
| 30    | 4            | RSV146H   | 4-59           | 2-15           | 4              | 1        | 0                | 17      | 0       | 2           | 1           | 17               | FJ385403       |
|       | 4            | RSV165H   | 1-03           | 1-07           | 5              | 0        | 0                | 18      | 0       | 0           | 0           | 17               | FJ385419       |
|       | 4            | RSV166H   | 3-73           | 3-16           | 4              | 1        | 0                | 8       | 1       | 1           | 0           | 14               | FJ385420       |
|       | 4            | RSV177H   | 1-18           | 3-03           | 6              | 1        | 1                | 8       | 3       | 1           | 0           | 21               | FJ385428       |
| 30    | 11           | RSV133H   | 3-48           | 5-24           | 4              | 0        | 0                | 17      | 1       | 0           | 0           | 17               | FJ385400       |
|       | 11           | RSV134H   | 3-73           | 3-10           | 3              | 0        | 0                | 15      | 0       | 4           | 0           | 20               | FJ385401       |
|       | 11           | RSV141H   | 4-39           | 2-21           | 3              | 0        | 0                | 23      | 0       | 0           | 0           | 19               | FJ385402       |
|       | 11           | RSV167H   | 4-59           | 3-03           | 4              | 0        | 0                | 10      | 3       | 0           | 0           | 19               | FJ385421       |
|       | 11           | RSV168H   | 3-49           | 3-16           | 6              | 1        | 0                | 22      | 0       | 1           | 0           | 27               | FJ385422       |
|       | 11           | RSV169H-2 | 4-39           | 3-22           | 5              | 1        | 0                | 12      | 1       | 4           | 0           | 21               | FJ385423       |
|       | 11           | RSV170H   | 1-69           | 6-19           | 3              | 0        | 1                | 5       | 0       | 2           | 1           | 15               | FJ385424       |
|       | 11           | RSV171H   | 3-30.3         | 3-10           | 4              | 0        | 0                | 16      | 0       | 0           | 2           | 23               | FJ385425       |
|       | 11           | RSV172H   | 4-04           | 5-05           | 6              | 0        | 0                | 6       | 3       | 0           | 0           | 21               | FJ385426       |
| 34    | 3            | RSV107H   | 1-18           | 3-10           | 4              | 0        | 0                | 11      | 0       | 1           | 0           | 15               | FJ385390       |
| 36    | 8            | RSV109H   | 4-59           | 6-19           | 3              | 0        | 0                | 6       | 0       | 0           | 2           | 14               | FJ385391       |
|       | 8            | RSV110H   | 3-13           | 2-15           | 3              | 2        | 0                | 3       | 0       | 0           | 0           | 16               | FJ385392       |
|       | 8            | RSV111H   | 7-04           | 3-16           | 4              | 1        | 0                | 5       | 2       | 1           | 0           | 14               | FJ385393       |
|       | 8            | RSV112H   | 1-02           | 6-06           | 4              | 2        | 2                | 0       | 0       | 1           | 0           | 11               | FJ385394       |
|       | 8            | RSV113H   | 4-59           | 1-26           | 3              | 0        | 0                | 1       | 1       | 4           | 0           | 13               | FJ385395       |
|       | 8            | RSV114H   | 1-02           | 6-06           | 4              | 0        | 0                | 3       | 1       | 0           | 1           | 14               | FJ385396       |
|       | 8            | RSV115H   | 1-46           | 6-06           | 6              | 0        | 1                | 12      | 0       | 1           | 1           | 21               | FJ385397       |
| 39    | 11           | RSV76H    | 3-48           | NA             | 4              | 16       | 8                | 1       | 0       | 1           | 0           | 6                | FJ385383       |
| 44    | 8            | RSV83HA   | 3-23           | 6-13           | 4              | 0        | 2                | 10      | 0       | 2           | 2           | 15               | FJ385384       |
|       | 8            | RSV95HA   | 3-09           | 2-02           | 3              | 0        | 0                | 4       | 0       | 1           | 0           | 12               | FJ385385       |
|       | 8            | RSV97HA   | 4-04           | 3-22           | 3              | 0        | 0                | 9       | 0       | 0           | 0           | 20               | FJ385386       |
|       | 8            | RSV98H    | 1-02           | NA             | 4              | 1        | 0                | 2       | 2       | 0           | 0           | 11               | FJ385387       |
|       | 8            | RSV100HB  | 1-02           | 1-01           | 4              | 0        | 0                | 1       | 0       | 3           | 0           | 10               | FJ385388       |
|       | 8            | RSV103H   | 3-23           | 3-10           | 4              | 0        | 0                | 6       | 0       | 0           | 1           | 11               | FJ385389       |
|       | 8            | RSV173H   | 3-15           | 4-17           | 4              | 0        | 0                | 24      | 2       | 0           | 0           | 19               | FJ385427       |
| 46    | 8            | RSV150H   | 4-59           | 1-14           | 6              | 0        | 0                | 0       | 0       | 2           | 0           | 14               | FJ385404       |
|       | 8            | RSV151H   | 1-69           | 3-03           | 5              | 0        | 0                | 18      | 0       | 2           | 0           | 22               | FJ385405       |
|       | 8            | RSV152HA  | 6-01           | 2-15           | 5              | 0        | 0                | 2       | 0       | 1           | 2           | 10               | FJ385406       |
|       | 8            | RSV153H   | 3-33           | 3-10           | 5              | 0        | 0                | 3       | 0       | 1           | 0           | 15               | FJ385407       |
|       | 8            | RSV154H   | 1-03           | 3-09           | 6              | 1        | 0                | 2       | 0       | 2           | 2           | 17               | FJ385408       |
|       | 8            | RSV155H   | 3-15           | 1-26           | 6              | 0        | 0                | 1       | 0       | 2           | 0           | 16               | FJ385409       |
|       | 8            | RSV156HB  | 1-69           | 3-03           | 5              | 1        | 0                | 9       | 0       | 0           | 0           | 16               | FJ385410       |

Supplementary Table III. Characterization of RSV specific V<sub>H</sub> regions in infant donors <3 months

| Donor | Age in weeks | Clone     | V <sub>H</sub> | D <sub>H</sub> | J <sub>H</sub> | Total Fr | Total CDR1 and 2 | Total N | Total P | D Mutations | J Mutations | CDR3 length (aa) | GenBank number |
|-------|--------------|-----------|----------------|----------------|----------------|----------|------------------|---------|---------|-------------|-------------|------------------|----------------|
| 46    | 8            | RSV158H   | 4-04           | 3-16           | 4              | 0        | 0                | 2       | 0       | 4           | 1           | 12               | FJ385412       |
|       | 8            | RSV159H   | 4-30-2         | 3-03           | 4              | 0        | 0                | 10      | 1       | 2           | 0           | 18               | FJ385413       |
|       | 8            | RSV160HA  | 1-03           | 3-09           | 5              | 1        | 0                | 17      | 1       | 1           | 2           | 22               | FJ385414       |
|       | 8            | RSV161HA  | 1-46           | 6-19           | 6              | 1        | 0                | 6       | 3       | 1           | 1           | 22               | FJ385415       |
|       | 8            | RSV162H   | 4-59           | 6-13           | 6              | 1        | 0                | 14      | 0       | 1           | 2           | 21               | FJ385416       |
|       | 8            | RSV163HB  | 4-59           | 3-03           | 6              | 0        | 0                | 29      | 0       | 0           | 0           | 22               | FJ385417       |
|       | 8            | RSV164HA  | 1-03           | 3-10           | 4              | 0        | 0                | 16      | 0       | 0           | 2           | 18               | FJ385418       |
|       | 8            | RSV178H-2 | 1-02           | 3-22           | 6              | 0        | 0                | 1       | 0       | 2           | 0           | 17               | FJ385429       |
|       | 8            | RSV179H   | 1-69           | 3-03           | 5              | 0        | 0                | 6       | 0       | 1           | 0           | 14               | FJ385430       |
|       | 8            | RSV180H-1 | 1-69           | 6-13           | 5              | 0        | 0                | 5       | 0       | 0           | 0           | 15               | FJ385431       |
|       | 8            | RSV181H   | 5-a            | 3-16           | 4              | 0        | 0                | 9       | 0       | 2           | 2           | 18               | FJ385432       |
|       | 8            | RSV182H   | 3-49           | 2-02           | 6              | 1        | 0                | 8       | 0       | 1           | 1           | 24               | FJ385433       |
|       | 8            | RSV183H   | 4-39           | 2-15           | 6              | 0        | 0                | 12      | 0       | 2           | 0           | 19               | FJ385434       |
| 8     | RSV184H-2    | 4-39      | 6-19           | 6              | 0              | 0        | 1                | 3       | 4       | 0           | 19          | FJ385435         |                |

Supplementary Table IV. Characterization of RSV specific V<sub>L</sub> regions in adult donors

| Donor | Clone   | V <sub>L</sub> | J <sub>L</sub> | Total Fr | Total CDR | Total N | Total P | J Mutations | CDR3 length (aa) | GenBank numbers |
|-------|---------|----------------|----------------|----------|-----------|---------|---------|-------------|------------------|-----------------|
| 1     | RSV1L   | K3-11          | K5             | 0        | 0         | 0       | 0       | 0           | 11               | FJ385436        |
|       | RSV2L   | L2-14          | L2             | 0        | 3         | 0       | 0       | 0           | 11               | FJ385437        |
|       | RSV3L   | L2-23          | L3             | 0        | 0         | 0       | 0       | 0           | 8                | FJ385438        |
|       | RSV4L   | K3-11          | K5             | 0        | 0         | 0       | 0       | 0           | 10               | FJ385439        |
|       | RSV5L   | L1-44          | L3             | 11       | 3         | 0       | 0       | 0           | 11               | FJ385440        |
|       | RSV6L   | K3-11          | K2             | 0        | 1         | 0       | 0       | 0           | 10               | FJ385441        |
| 3     | RSV7L   | L3-01          | L3             | 0        | 0         | 0       | 0       | 0           | 10               | FJ385442        |
|       | RSV14L  | L3-25          | L2/3           | 11       | 8         | 0       | 0       | 1           | 11               | FJ385449        |
|       | RSV18L  | K4-01          | K4             | 2        | 4         | 0       | 0       | 0           | 9                | FJ385451        |
|       | RSV19L  | K4-01          | K5             | 2        | 5         | 0       | 0       | 0           | 9                | FJ385452        |
| 4     | RSV8L   | L2-11          | L1             | 0        | 0         | 0       | 0       | 0           | 8                | FJ385443        |
|       | RSV9L   | K1-39          | K1             | 0        | 0         | 0       | 0       | 0           | 10               | FJ385444        |
|       | RSV10L  | L1-44          | L3             | 0        | 0         | 0       | 0       | 0           | 11               | FJ385445        |
|       | RSV11L  | K3-20          | K1             | 0        | 0         | 0       | 0       | 0           | 9                | FJ385446        |
|       | RSV12L  | K1-27          | K3             | 0        | 0         | 0       | 0       | 0           | 7                | FJ385447        |
|       | RSV13L  | K1-33          | K4             | 0        | 0         | 0       | 0       | 0           | 9                | FJ385448        |
|       | RSV16L  | L3-01          | L7             | 0        | 0         | 0       | 0       | 0           | 9                | FJ385450        |
| 12    | RSV33L  | K1-33          | K2             | 7        | 6         | 0       | 0       | 0           | 9                | FJ385460        |
| 13    | RSV28L  | K4-01          | K1             | 0        | 0         | 0       | 0       | 0           | 9                | FJ385457        |
|       | RSV29L  | K1-05          | K1             | 0        | 0         | 0       | 0       | 2           | 9                | FJ385458        |
|       | RSV32L  | K3-20          | K4             | 0        | 0         | 0       | 0       | 0           | 9                | FJ385459        |
|       | RSV34L  | L8-61          | L3             | 2        | 2         | 0       | 0       | 0           | 10               | FJ385461        |
|       | RSV35L  | L2-23          | L3             | 0        | 0         | 0       | 0       | 0           | 9                | FJ385462        |
|       | RSV36L  | K3-15          | K1             | 13       | 7         | 0       | 0       | 0           | 8                | FJ385463        |
|       | RSV37L  | L1-51          | L3             | 0        | 0         | 0       | 0       | 0           | 11               | FJ385464        |
|       | RSV44L  | K3-20          | K1             | 2        | 2         | 0       | 0       | 0           | 8                | FJ385468        |
|       | RSV45L  | K3-20          | K3             | 1        | 1         | 0       | 0       | 0           | 8                | FJ385469        |
|       | RSV47L  | K2-28          | K5             | 2        | 0         | 0       | 0       | 0           | 9                | FJ385470        |
|       | RSV50L  | L1-50          | L1             | 0        | 0         | 0       | 0       | 0           | 11               | FJ385471        |
|       | RSV53L  | K2-28          | K2             | 0        | 0         | 0       | 0       | 0           | 10               | FJ385472        |
|       | RSV54L  | K1-05          | K4             | 9        | 7         | 0       | 0       | 0           | 8                | FJ385473        |
| 14    | RSV22L  | K1-12          | K4             | 2        | 1         | 0       | 0       | 0           | 5                | FJ385453        |
|       | RSV23L  | K3-11          | K5             | 0        | 0         | 0       | 0       | 0           | 9                | FJ385454        |
|       | RSV24L  | K2-40          | K2             | 0        | 0         | 0       | 0       | 0           | 5                | FJ385455        |
|       | RSV25L  | L3-21          | L3             | 0        | 0         | 0       | 0       | 0           | 11               | FJ385456        |
|       | RSV26L  | L3-21          | 33             | 0        | 0         | 0       | 0       | 0           | 11               |                 |
| 15    | RSV39L  | K4-01          | K1             | 0        | 0         | 0       | 0       | 0           | 9                | FJ385465        |
|       | RSV41L  | K3-11          | K5             | 0        | 1         | 0       | 0       | 0           | 10               | FJ385466        |
|       | RSV42L  | K3-20          | K3             | 4        | 1         | 0       | 0       | 0           | 9                | FJ385467        |
| 20    | RSV201L | L3-25          | L3             | 0        | 0         | 0       | 0       | 0           | 11               | FJ385474        |
|       | RSV206L | K3-11          | K2             | 0        | 0         | 0       | 0       | 3           | 10               | FJ385475        |
|       | RSV207L | K3-11          | K1             | 0        | 0         | 4       | 2       | 0           | 12               | FJ385476        |
|       | RSV208L | K1-39          | K4             | 1        | 3         | 0       | 0       | 0           | 8                | FJ385477        |

Supplementary Table IV. Characterization of RSV specific V<sub>L</sub> regions in adult donors

| Donor | Clone    | V <sub>L</sub> | J <sub>L</sub> | Total Fr | Total CDR | Total N | Total P | J Mutations | CDR3 length (aa) | GenBank numbers |
|-------|----------|----------------|----------------|----------|-----------|---------|---------|-------------|------------------|-----------------|
|       | RSV209L  | K3-15          | K2             | 1        | 0         | 0       | 0       | 0           | 10               | FJ385478        |
|       | RSV210L  | K3-11          | K2             | 0        | 2         | 0       | 0       | 0           | 10               | FJ385479        |
|       | RSV211L  | K1-33          | K2             | 1        | 2         | 0       | 0       | 2           | 9                | FJ385480        |
|       | RSV243LA | K3-11          | K4             | 0        | 0         | 0       | 0       | 0           | 10               | FJ385498        |
|       | RSV244L  | K3-11          | K4             | 1        | 1         | 1       | 0       | 0           | 10               | FJ385499        |
| 33    | RSV212L  | K2-28          | K4             | 0        | 1         | 0       | 0       | 0           | 9                | FJ385481        |
|       | RSV214L  | K4-01          | K2             | 0        | 0         | 0       | 0       | 1           | 9                | FJ385482        |
|       | RSV215L  | K3-20          | K4             | 0        | 2         | 0       | 0       | 0           | 9                | FJ385483        |
|       | RSV217LB | K1-05          | K2             | 0        | 0         | 1       | 0       | 0           | 5                | FJ385484        |
|       | RSV218L  | K3-20          | K2             | 0        | 1         | 0       | 0       | 1           | 10               | FJ385485        |
|       | RSV219L  | K3-11          | K2             | 1        | 0         | 0       | 2       | 1           | 11               | FJ385486        |
| 37    | RSV220LA | K1-05          | K1             | 1        | 1         | 0       | 0       | 0           | 9                | FJ385487        |
|       | RSV225L  | K3-20          | K1             | 7        | 5         | 0       | 0       | 0           | 9                | FJ385489        |
|       | RSV226L  | K4-01          | K5             | 0        | 0         | 0       | 0       | 0           | 9                | FJ385490        |
|       | RSV227LB | K1-39          | K2             | 2        | 6         | 0       | 0       | 0           | 8                | FJ385491        |
| 43    | RSV229L  | K3-15          | K4             | 2        | 0         | 6       | 0       | 0           | 10               | FJ385492        |
|       | RSV230LA | K1-05          | K4             | 6        | 7         | 0       | 0       | 0           | 9                | FJ385493        |
|       | RSV231L  | K3-15          | K3             | 1        | 0         | 0       | 0       | 0           | 10               | FJ385494        |
|       | RSV232L  | K1-33          | K4             | 0        | 3         | 0       | 0       | 0           | 8                | FJ385495        |
|       | RSV233LB | K3-15          | K4             | 2        | 0         | 0       | 0       | 0           | 10               | FJ385496        |
|       | RSV237L  | K3-20          | K5             | 0        | 0         | 0       | 0       | 0           | 9                | FJ385497        |

Supplementary Table V. Characterization of RSV specific V<sub>L</sub> regions in infant donors >3months

| Donor | Age in months | Clone    | V <sub>L</sub> | J <sub>L</sub> | Total Fr | Total CDR | Total N | Total P | J Mutations | CDR3 length (aa) | GenBank numbers |
|-------|---------------|----------|----------------|----------------|----------|-----------|---------|---------|-------------|------------------|-----------------|
| 23    | 36            | RSV65L   | K1-09          | K2             | 0        | 0         | 0       | 0       | 0           | 9                | FJ385500        |
| 24    | 60            | RSV66L   | K3-11          | K4             | 2        | 1         | 0       | 0       | 0           | 9                | FJ385501        |
|       | 60            | RSV67L   | K3-20          | K3             | 3        | 4         | 0       | 0       | 0           | 9                | FJ385502        |
| 25    | 15            | RSV70L   | K1-13          | K4             | 45       | 20        | 2       | 0       | 0           | 9                | FJ385503        |
|       | 15            | RSV174LA | K4-01          | K1             | 2        | 1         | 0       | 0       | 0           | 9                | FJ385520        |
|       | 15            | RSV175L  | K4-01          | K1             | 3        | 1         | 0       | 0       | 0           | 9                | FJ385521        |
| 40    | 20            | RSV77L   | K2-28          | K1             | 1        | 0         | 0       | 0       | 2           | 9                | FJ385504        |
|       | 20            | RSV79L   | L3-25          | L3             | 1        | 0         | 0       | 0       | 0           | 11               | FJ385505        |
|       | 20            | RSV80L   | L8-61          | L3             | 3        | 8         | 0       | 0       | 0           | 10               | FJ385506        |
|       | 20            | RSV81L   | L2-11          | L3             | 14       | 10        | 3       | 0       | 2           | 10               | FJ385507        |
| 41    | 8             | RSV82L   | K3-15          | K2             | 0        | 0         | 0       | 0       | 0           | 10               | FJ385508        |
|       | 8             | RSV83L   | L9-49          | L3             | 0        | 0         | 0       | 0       | 0           | 13               | FJ385509        |
|       | 8             | RSV84L   | L1-47          | L3             | 0        | 2         | 0       | 0       | 0           | 11               | FJ385510        |
|       | 8             | RSV86L   | K4-01          | K1             | 1        | 2         | 0       | 0       | 0           | 8                | FJ385511        |
|       | 8             | RSV88L   | K1-17          | K4             | 1        | 0         | 0       | 0       | 0           | 9                | FJ385512        |
|       | 8             | RSV89L   | L2-14          | L1             | 2        | 1         | 0       | 0       | 0           | 10               | FJ385513        |
|       | 8             | RSV90L   | L3-27          | L3             | 0        | 0         | 3       | 0       | 0           | 9                | FJ385514        |
|       | 8             | RSV91L   | L3-19          | L3             | 0        | 0         | 0       | 0       | 0           | 11               | FJ385515        |
|       | 8             | RSV94LA  | K1-17          | K4             | 0        | 0         | 0       | 0       | 0           | 9                | FJ385516        |
|       | 8             | RSV116L  | K3-11          | K4             | 0        | 1         | 0       | 0       | 0           | 9                | FJ385517        |
| 8     | RSV117LA      | K3-11    | K4             | 0              | 1        | 0         | 0       | 0       | 9           | FJ385518         |                 |
| 8     | RSV118L       | K3-11    | K4             | 0              | 0        | 0         | 0       | 0       | 9           | FJ385519         |                 |

Supplementary Table VI. Characterization of RSV specific V<sub>L</sub> regions in infant donors <3months

| Donor | Age in weeks | Clone    | V <sub>L</sub> | J <sub>L</sub> | Total Fr | Total CDR | Total N | Total P | J Mutations | CDR3 length (aa) | GenBank numbers |
|-------|--------------|----------|----------------|----------------|----------|-----------|---------|---------|-------------|------------------|-----------------|
| 22    | 8            | RSV60L   | L1-44          | L3             | 0        | 0         | 0       | 0       | 0           | 11               | FJ385522        |
|       | 8            | RSV61L   | K3-20          | K2             | 0        | 0         | 0       | 0       | 0           | 9                | FJ385523        |
|       | 8            | RSV64L   | K3-20          | K2             | 2        | 0         | 1       | 0       | 1           | 9                | FJ385524        |
|       | 8            | RSV121L  | K3-20          | K1             | 0        | 0         | 2       | 0       | 0           | 9                | FJ385544        |
| 28    | 8            | RSV127L  | K4-01          | K5             | 0        | 0         | 0       | 0       | 0           | 8                | FJ385548        |
| 29    | 11           | RSV128L  | L1-40          | L1             | 0        | 0         | 0       | 0       | 0           | 11               | FJ385549        |
| 30    | 4            | RSV146LA | K3-20          | K4             | 0        | 0         | 0       | 0       | 0           | 9                | FJ385553        |
|       | 4            | RSV165L  | K1-39          | K2             | 0        | 0         | 0       | 0       | 1           | 10               | FJ385566        |
| 31    | 11           | RSV167L  | K1-33          | K4             | 0        | 0         | 0       | 0       | 0           | 9                | FJ385567        |
|       | 11           | RSV168L  | L1-51          | L3             | 0        | 0         | 0       | 0       | 0           | 11               | FJ385568        |
|       | 11           | RSV169L  | K3-11          | K3             | 0        | 0         | 1       | 2       | 0           | 11               | FJ385569        |
|       | 11           | RSV170L  | K1-39          | K2             | 0        | 0         | 0       | 0       | 0           | 9                | FJ385570        |
|       | 11           | RSV172L  | K3-20          | K4             | 0        | 0         | 0       | 0       | 0           | 9                | FJ385571        |
|       | 11           | RSV132L  | K3-11          | K3             | 0        | 0         | 1       | 2       | 0           | 11               | FJ385550        |
|       | 11           | RSV133L  | L2-14          | L3             | 0        | 0         | 0       | 0       | 0           | 11               | FJ385551        |
|       | 11           | RSV134L  | L3-10          | L3             | 0        | 1         | 0       | 0       | 0           | 11               | FJ385552        |
| 34    | 4            | RSV104L  | K4-01          | K3             | 1        | 0         | 0       | 0       | 0           | 9                | FJ385533        |
|       | 4            | RSV105L  | K3-20          | K2             | 0        | 0         | 0       | 0       | 0           | 9                | FJ385534        |
|       | 4            | RSV106LA | K3-15          | K1             | 1        | 0         | 0       | 0       | 0           | 10               | FJ385535        |
|       | 4            | RSV107L  | K3-20          | K1             | 0        | 3         | 0       | 0       | 0           | 8                | FJ385536        |
| 36    | 8            | RSV108LB | K2-30          | K5             | 0        | 0         | 0       | 0       | 0           | 9                | FJ385537        |
|       | 8            | RSV109L  | K3-15          | K4             | 0        | 0         | 0       | 0       | 0           | 10               | FJ385538        |
|       | 8            | RSV110L  | K1-39          | K3             | 0        | 0         | 0       | 0       | 0           | 9                | FJ385539        |
|       | 8            | RSV111L  | K3-11          | K4             | 0        | 1         | 0       | 0       | 0           | 9                | FJ385540        |
|       | 8            | RSV112L  | K3-11          | K4             | 0        | 1         | 0       | 0       | 0           | 9                | FJ385541        |
|       | 8            | RSV113L  | K4-01          | K4             | 0        | 0         | 1       | 0       | 0           | 10               | FJ385542        |
|       | 8            | RSV115L  | K1-39          | K2             | 0        | 0         | 0       | 0       | 1           | 9                | FJ385543        |
| 39    | 11           | RSV75L   | L2-11          | L3             | 0        | 0         | 0       | 0       | 0           | 10               | FJ385525        |
|       | 11           | RSV76L   | L6-57          | L3             | 1        | 0         | 0       | 0       | 0           | 9                | FJ385526        |
| 44    | 8            | RSV96L   | K3-20          | K5             | 0        | 0         | 0       | 0       | 1           | 9                | FJ385527        |
|       | 8            | RSV98L   | L2-14          | L3             | 0        | 0         | 0       | 0       | 0           | 10               | FJ385528        |
|       | 8            | RSV99L   | K3-15          | K2             | 0        | 1         | 1       | 1       | 0           | 11               | FJ385529        |
|       | 8            | RSV100L  | L5-45          | L3             | 0        | 0         | 0       | 0       | 0           | 9                | FJ385530        |
|       | 8            | RSV102L  | K3-20          | K1             | 0        | 0         | 0       | 0       | 2           | 9                | FJ385531        |
|       | 8            | RSV103L  | K3-15          | K1             | 0        | 0         | 0       | 0       | 0           | 10               | FJ385532        |
|       | 8            | RSV173LA | K3-15          | K2             | 0        | 0         | 0       | 2       | 0           | 11               | FJ385572        |
| 46    | 8            | RSV122L  | K4-01          | K1             | 0        | 1         | 0       | 0       | 1           | 9                | FJ385545        |
|       | 8            | RSV123L  | K3-15          | K3             | 1        | 1         | 0       | 0       | 0           | 8                | FJ385546        |
|       | 8            | RSV124L  | K3-20          | K5             | 0        | 0         | 0       | 0       | 0           | 6                | FJ385547        |
|       | 8            | RSV150L  | K3-20          | K1             | 0        | 2         | 0       | 0       | 0           | 8                | FJ385554        |
|       | 8            | RSV151L  | L2-23          | L1             | 0        | 0         | 0       | 0       | 0           | 11               | FJ385555        |
|       | 8            | RSV152   | K1-39          | K5             | 0        | 0         | 0       | 0       | 0           | 5                | FJ385556        |
|       | 8            | RSV154L  | K1-39          | K2             | 0        | 0         | 0       | 0       | 0           | 9                | FJ385557        |

Supplementary Table VI. Characterization of RSV specific V<sub>L</sub> regions in infant donors <3months

| Donor | Age in weeks | Clone    | V <sub>L</sub> | J <sub>L</sub> | Total Fr | Total CDR | Total N | Total P | J Mutations | CDR3 length (aa) | GenBank numbers |
|-------|--------------|----------|----------------|----------------|----------|-----------|---------|---------|-------------|------------------|-----------------|
|       | 8            | RSV155LA | L2-11          | L7             | 0        | 0         | 0       | 0       | 1           | 10               | FJ385558        |
|       | 8            | RSV156LA | K1-17          | K4             | 2        | 0         | 0       | 0       | 0           | 9                | FJ385559        |
|       | 8            | RSV157L  | K1-39          | K2             | 0        | 0         | 0       | 0       | 1           | 9                | FJ385560        |
|       | 8            | RSV158L  | K2-30          | K3             | 0        | 0         | 0       | 0       | 0           | 9                | FJ385561        |
|       | 8            | RSV159L  | K3-11          | K4             | 0        | 3         | 0       | 0       | 0           | 8                | FJ385562        |
|       | 8            | RSV162LA | K1-09          | K3             | 0        | 0         | 0       | 0       | 0           | 9                | FJ385563        |
|       | 8            | RSV163L  | L3-01          | L2/3           | 0        | 0         | 0       | 0       | 1           | 9                | FJ385564        |
|       | 8            | RSV164L  | K3-20          | K4             | 0        | 0         | 0       | 0       | 0           | 9                | FJ385565        |
|       | 8            | RSV179LA | K3-11          | K3             | 0        | 0         | 3       | 2       | 0           | 11               | FJ385573        |
|       | 8            | RSV181LA | K1-33          | K2             | 1        | 0         | 0       | 2       | 0           | 10               | FJ385574        |
